# Supplementary material for: The curious case of zeolite–clay/binder interactions and their consequences for catalyst preparation
Source: Royal Society of Chemistry journal article supplement (doi:10.1039/c5fd00200a), 2015-12-02
Supplement: c5fd00200a1.pdf [file c5fd00200a1.pdf]

## The Curious Case of Zeolite-Clay/Binder Interactions and Their Consequences for Catalyst Preparation

Gareth T. Whiting<sup>†\*</sup>, Abhishek Dutta Chowdhury<sup>†</sup>, Ramon Oord, Pasi Paalanen, Bert M. Weckhuysen<sup>\*</sup>

*Inorganic Chemistry and Catalysis group, Debye Institute for Nanomaterials Science, Utrecht University, Universiteitsweg 99, 3584 CG Utrecht, The Netherlands*

\* To whom correspondence should be addressed: [g.t.whiting@uu.nl](mailto:g.t.whiting@uu.nl); [b.m.weckhuysen@uu.nl](mailto:b.m.weckhuysen@uu.nl)

<sup>†</sup> Authors contributed equally to this work.

### Supporting Information

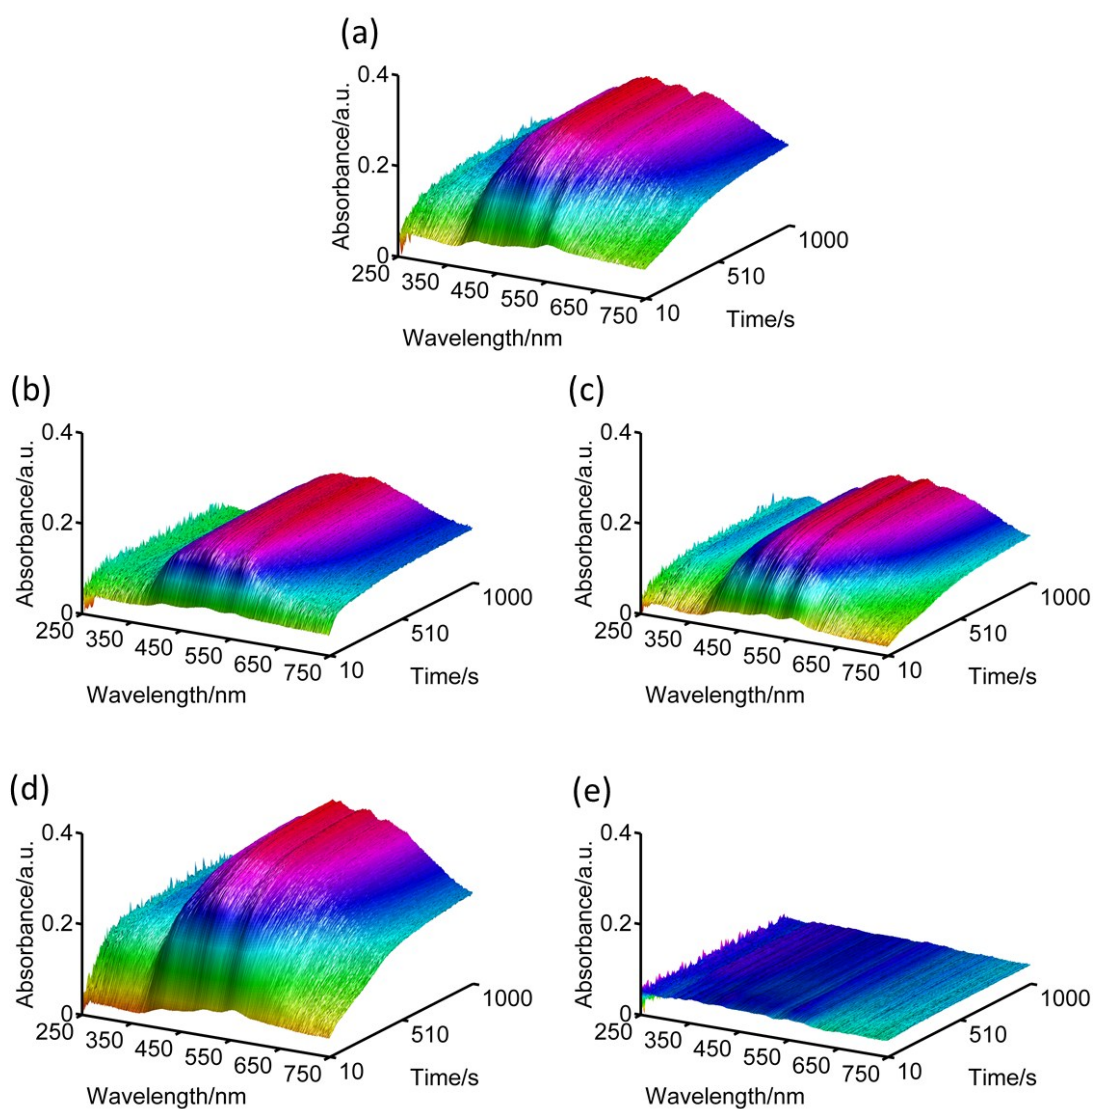

**Figure S1:** UV-Vis absorption spectra of the following samples upon reaction with thiophene over a period of 1000 s (from 30°C to 120°C): (a) ZSM-5; (b) ZSM-5-Si; (c) ZSM-5-Al; (d) ZSM-5-SiAl; (e) ZSM-5-Kao.

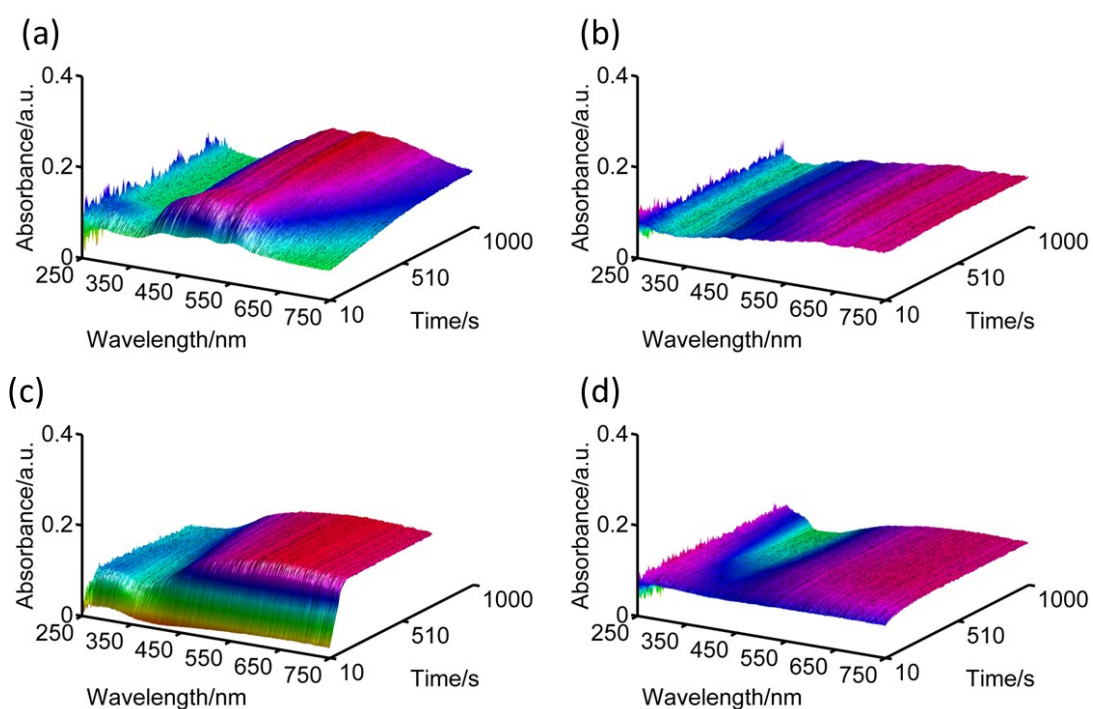

**Figure S2:** UV-Vis absorption spectra of the following samples upon reaction with thiophene over a period of 1000 s (from 30°C to 120°C): (a) Heat-treated ZSM-5 and non-heat-treated kaolinite pellet; (b) kaolinite; (c) SiO<sub>2</sub>; (d) Al<sub>2</sub>O<sub>3</sub>.

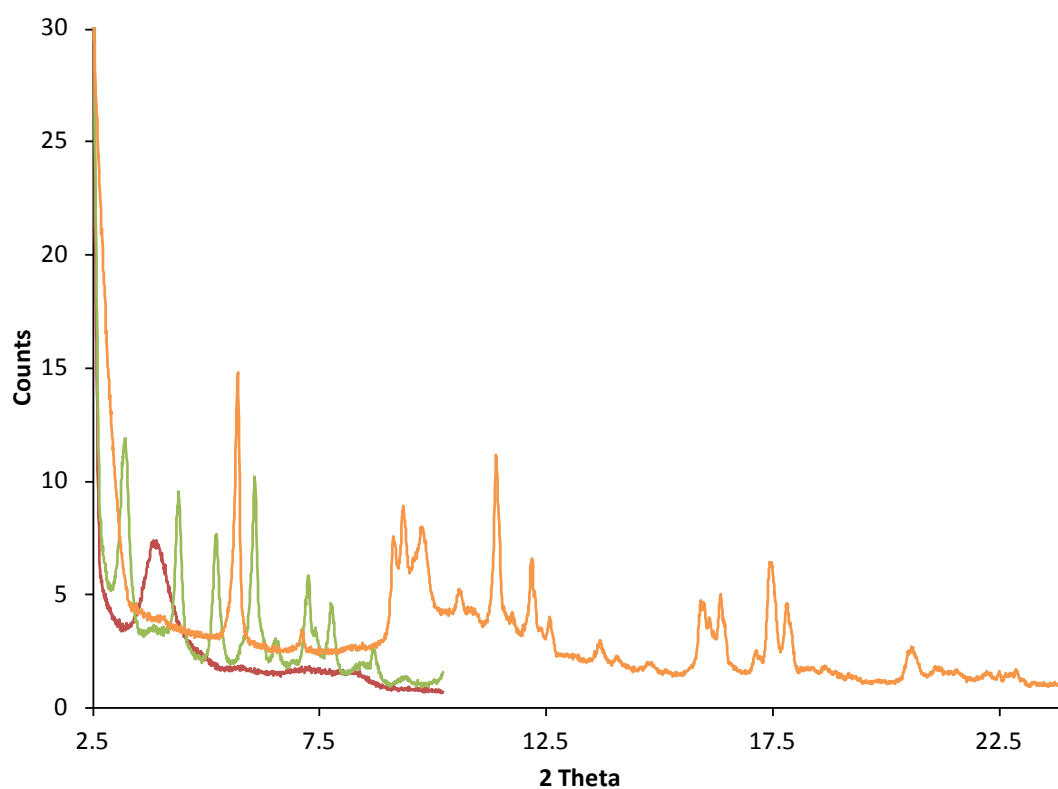

**Figure S3:** Powder X-Ray Diffraction (XRD) pattern of SiO<sub>2</sub> (red), Al<sub>2</sub>O<sub>3</sub> (green) and kaolinite (orange).

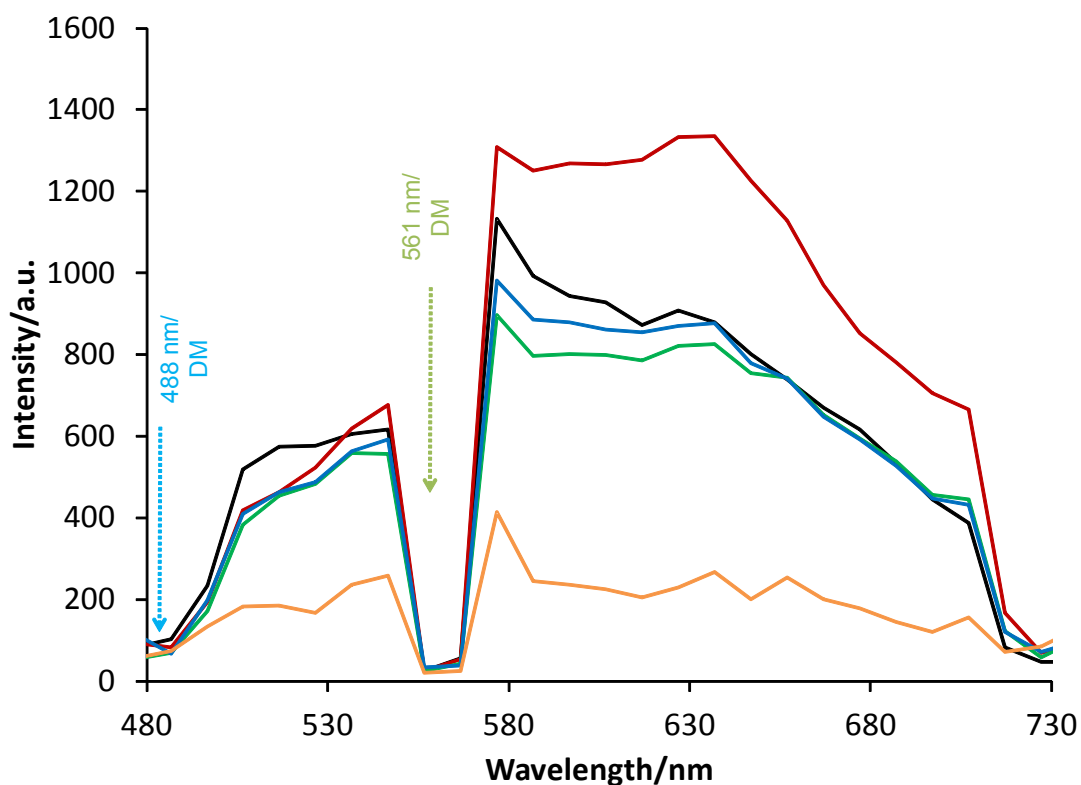

**Figure S4:** Fluorescence spectra of the following samples reacted with thiophene for a period of 1000 s (from 30°C to 120°C): ZSM-5 (black); ZSM-5-Si (red); ZSM-5-Al (green); ZSM-5-SiAl (blue); ZSM-5-Kao (orange). All samples excited using both 488 and 561 nm lasers simultaneously (with comparable laser power), recording fluorescence intensity in the region of 480 – 730 nm. (Dichroic mirrors introduced at 488 and 561 nm). This Figure corresponds with Figure 5 in the main text.

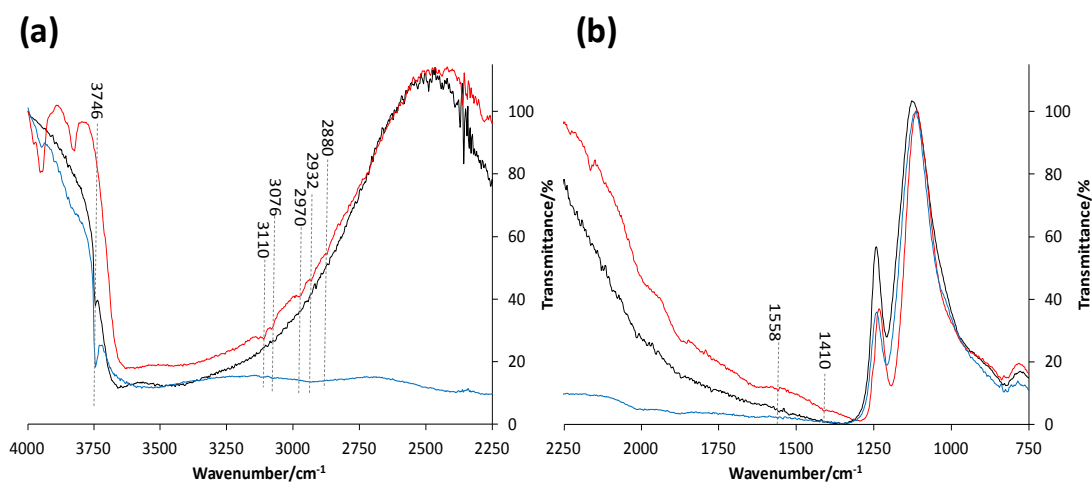

**Figure S5:** *In-situ* FT-IR spectra of (a, b) ZSM-5, before (black), during (red) and after (blue) reaction with thiophene.
